# Supplementary material
Source: PubMed Central journal article supplement (PMC6640479)
Supplement: MPP-12-580-s002.pdf [file MPP-12-580-s002.pdf]

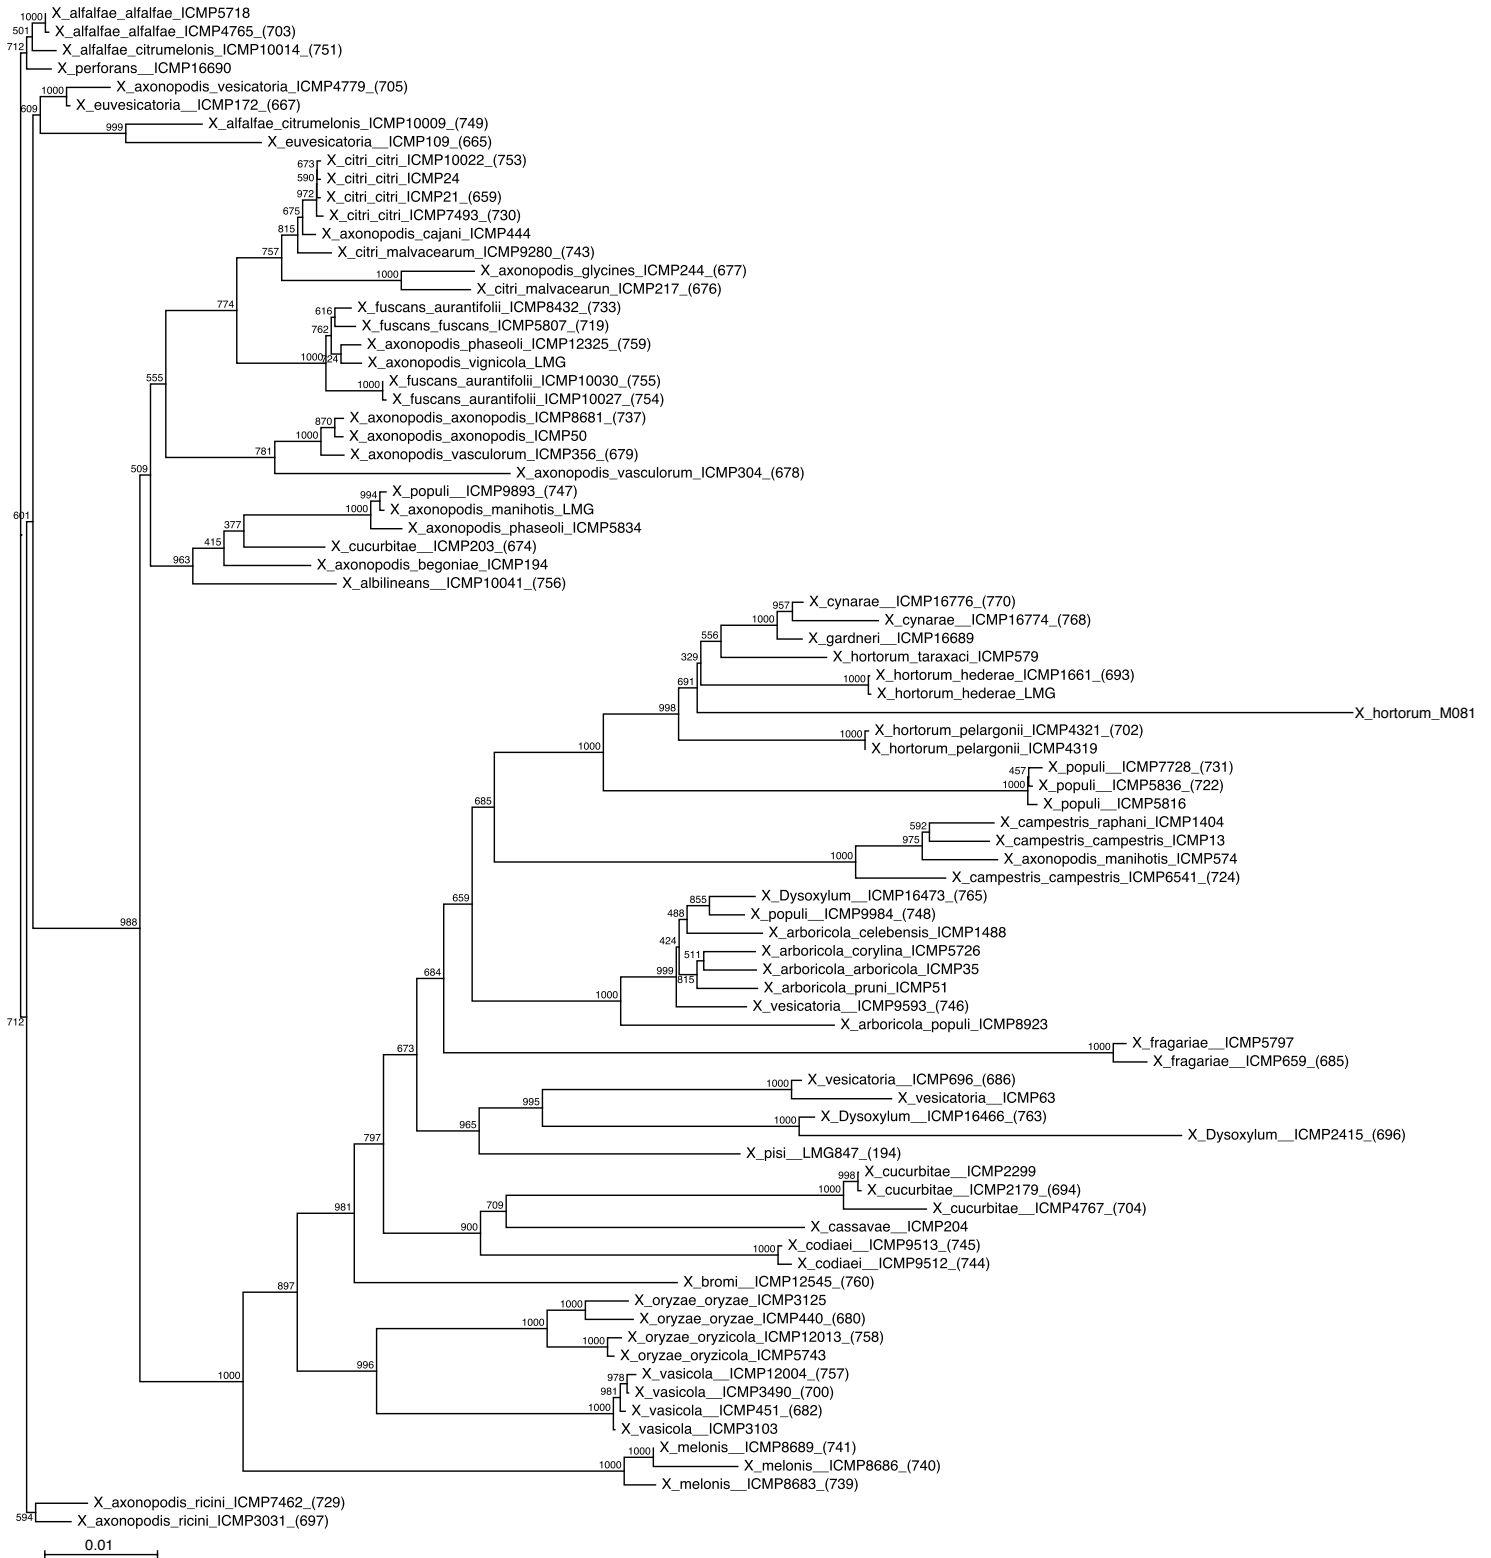

**Supplementary figure 1. Complete neighbor joining tree of concatenated nucleotide sequences for partial *dnaK*, *fyuA*, *gyrB*, and *rpoD* genes from *Xanthomonas* strains (Young et al., 2008). Numbers indicate bootstrap support ( $r = 1000$ ). The scale bars indicate the number of amino acid substitutions per site.**
